# Supplementary material for: Assessing the Level and Determinants of COVID-19 Vaccine Confidence in Kenya
Source: MDPI journal article supplement (doi:10.3390/vaccines9080936), 2021-08-23
Supplement: s1 [file s1]

**Table S1.** Description of dependent and independent variables for the multilevel logistic regression.

| Description                                                                              | Categorization                                                                     | Notes                                                                                                                                                                                                           |
|------------------------------------------------------------------------------------------|------------------------------------------------------------------------------------|-----------------------------------------------------------------------------------------------------------------------------------------------------------------------------------------------------------------|
| Dependent variable                                                                       |                                                                                    |                                                                                                                                                                                                                 |
| Vaccine Hesitancy                                                                        | 0: Vaccine Hesitant                                                                | Vaccine Hesitant (somewhat unlikely, very unlikely to accept the vaccine, or don't know)                                                                                                                        |
|                                                                                          | 1: Vaccine Accepting                                                               | Vaccine Accepting (very likely, or somewhat likely to accept the vaccine                                                                                                                                        |
| Independent variables: Socio-demographic factors                                         |                                                                                    |                                                                                                                                                                                                                 |
| County                                                                                   | 0: Urban county (Nairobi/Ki-sumu)                                                  |                                                                                                                                                                                                                 |
|                                                                                          | 1: Rural county (Kilifi/Wajir)                                                     |                                                                                                                                                                                                                 |
| Sex                                                                                      | 0: Female<br>1: Male                                                               |                                                                                                                                                                                                                 |
| Age                                                                                      | 1: 18-35 years<br>2: 36-57 years<br>3: 58+ years                                   |                                                                                                                                                                                                                 |
| Education                                                                                | 1: No schooling/pre-primary<br>2: Primary education<br>3: Secondary<br>4: Tertiary |                                                                                                                                                                                                                 |
| Marital status                                                                           | 0: Single<br>1: Married                                                            |                                                                                                                                                                                                                 |
| Total household size                                                                     | Continuous variable                                                                |                                                                                                                                                                                                                 |
| Socio-economic status                                                                    | 1: Tertile 1 (Poorest)<br>2: Tertile 2<br>3: Tertile 3 (Wealthiest)                | Principal component analysis was used to calculate socio-economic status based on (electricity, piped water source, reliable water source, livestock, and mobile phone ownership) and categorized into tertile. |
| Independent variables: Individual influences, risk and perceptions                       |                                                                                    |                                                                                                                                                                                                                 |
| Perceived risk of getting COVID                                                          | 0: Some risk (low risk, medium risk, high risk)<br>1: No risk                      |                                                                                                                                                                                                                 |
| Know someone in your family, neighbourhood or workplace who has been infected with COVID | 1: Know someone who tested positive/suspected of having COVID                      |                                                                                                                                                                                                                 |
|                                                                                          | 0: Do not know someone who tested positive/suspected of having COVID               |                                                                                                                                                                                                                 |

|                                                                                                         |                                                                                                            |                                                                                                                                                                                                                                                                                                                                                                                                                                                                                                                                                                                                                                                                                                                       |
|---------------------------------------------------------------------------------------------------------|------------------------------------------------------------------------------------------------------------|-----------------------------------------------------------------------------------------------------------------------------------------------------------------------------------------------------------------------------------------------------------------------------------------------------------------------------------------------------------------------------------------------------------------------------------------------------------------------------------------------------------------------------------------------------------------------------------------------------------------------------------------------------------------------------------------------------------------------|
| <b>Societal perception of having COVID</b>                                                              | 0. No perceived stigma<br>1. Perceived stigma                                                              | This was a composite variable of the following variables 1) People would stop talking to me 2) People would gossip about me 3) People I know would bring me the food I need 4) People I know would bring me the medicines I need 5) People in the community would treat me badly 6) After I recover from coronavirus, people in the community would still avoid me 7) After I recover from coronavirus, I would not be welcome back into my house by family 8) After I recover from coronavirus, I would not be welcome back at my place of work 9) After I recover from coronavirus, I would not be welcome back to my place of worship 10) After I recover from coronavirus, I would not be welcomed back to school |
| <b>Ease of following government regulations on COVID</b>                                                | 0: Easy to follow<br>1: Difficult to follow                                                                | Easy (Very easy to follow or somewhat easy to follow)<br><br>Difficult (Somewhat difficult to follow and very difficult to follow)                                                                                                                                                                                                                                                                                                                                                                                                                                                                                                                                                                                    |
| <b>Compared to the first few month of COVID, adherence to wearing of face masks over mouth and nose</b> | 0: More or about the same<br>1: Less                                                                       |                                                                                                                                                                                                                                                                                                                                                                                                                                                                                                                                                                                                                                                                                                                       |
| <b>Tested for Covid-19</b>                                                                              | 0: Tested for COVID<br>1: Never tested for COVID                                                           |                                                                                                                                                                                                                                                                                                                                                                                                                                                                                                                                                                                                                                                                                                                       |
| <b>Socio-economically impacted by COVID-19 measures</b>                                                 | 0: Socio-economically affected by measures<br>1: Not socio-economically affected by measures               | This is a composite variable of the following variables 1) skipped meals in the past 7 days because of not enough money or food 2) Complete loss of job as a result of COVID 3) Partial job loss as a result of COVID 4) Reduced healthcare access 5) economic status-making more or less than when the pandemic just began                                                                                                                                                                                                                                                                                                                                                                                           |
| <b>Independent variables: Context</b>                                                                   |                                                                                                            |                                                                                                                                                                                                                                                                                                                                                                                                                                                                                                                                                                                                                                                                                                                       |
| <b>Perceived measures taken by the community against COVID-19</b>                                       | 0: Community in support of COVID-19 prevention measures<br>1: Community does not support COVID-19 measures | This is a composite variable of the following variables: 1) Community taking steps to protect themselves and others from COVID-19 2) Community angry about social distancing measures due to COVID-19 3) Community work together to prevent and fight COVID-19                                                                                                                                                                                                                                                                                                                                                                                                                                                        |
| <b>Government and media as trusted source of information</b>                                            | 0: No<br>1: Yes                                                                                            | This is a composite variable of the following variables 1) Government SMS 2) government television advertisements 3) chief/administrators 4) government radio advertisements 5) television programs/shows 6) govt television adverts 7) radio programs/shows 8) internet 9) posters/print adverts 10) social media                                                                                                                                                                                                                                                                                                                                                                                                    |
| <b>Social Networks as trusted source of information</b>                                                 | 0: No<br>1: Yes                                                                                            | This is a composite variable of the following variables: 1) Friends 2) acquaintances/neighbours 3) work colleagues                                                                                                                                                                                                                                                                                                                                                                                                                                                                                                                                                                                                    |
| <b>Healthcare providers as trusted source of information</b>                                            | 0: No<br>1: Yes                                                                                            | This was a composite variable of the following variables: 1) Public health facility 2) private health facility 3) NGO provider 4) pharmacy 5) community health worker                                                                                                                                                                                                                                                                                                                                                                                                                                                                                                                                                 |
| <b>Community as trusted source of information</b>                                                       | 0: No<br>1: Yes                                                                                            | This was a composite variable of the following variables: 1) public announcements with megaphones 2) church/mosque/sheikh/religious leader 3) community meetings/spaces                                                                                                                                                                                                                                                                                                                                                                                                                                                                                                                                               |
| <b>Independent variables: Vaccination specific issues</b>                                               |                                                                                                            |                                                                                                                                                                                                                                                                                                                                                                                                                                                                                                                                                                                                                                                                                                                       |
| <b>Worry about side effects</b>                                                                         | 0: No<br>1: Yes                                                                                            | This was a composite variable combining: 1) vaccine trust 2) afraid of getting COVID after vaccination 3) worried about side effects                                                                                                                                                                                                                                                                                                                                                                                                                                                                                                                                                                                  |
| <b>Don't think the vaccine will be effective</b>                                                        | 0: No<br>1: Yes                                                                                            |                                                                                                                                                                                                                                                                                                                                                                                                                                                                                                                                                                                                                                                                                                                       |

|                                    |                 |
|------------------------------------|-----------------|
| Too busy to get vaccinated         | 0: No<br>1: Yes |
| Hard to access vaccination site    | 0: No<br>1: Yes |
| Scared of needles                  | 0: No<br>1: Yes |
| For religious and cultural reasons | 0: No<br>1: Yes |
